# Supplementary material for: Duration of delayed diagnosis in HIV/AIDS patients in Iran: a CD4 depletion model analysis
Source: Frontiers journal article supplement (doi:10.3389/fpubh.2023.1029608), 2023-04-17
Supplement: Data_Sheet_1.PDF [file Data_Sheet_1.PDF]

## Supplementary files

### 1- Model selection for the estimation of CD4 depletion model parameters in injection drugs users

**1-1- Model selection:** Comparison of the linear mixed effect models (random intercept, random slope, and random intercept and slop) in male injection drug users aged 15-25 years

| Model                            | N parameters | AIC    | BIC    | Log-likelihood | P *    |
|----------------------------------|--------------|--------|--------|----------------|--------|
| Random intercept                 | 4            | 2612.5 | 2628.4 | -1302.2        |        |
| Random slop                      | 6            | 2588.6 | 2612.6 | -1288.3        | 0.556  |
| Random intercept and slop        | 5            | 2587.0 | 2606.9 | -1288.5        | <0.001 |
| *P for the likelihood ratio test |              |        |        |                |        |

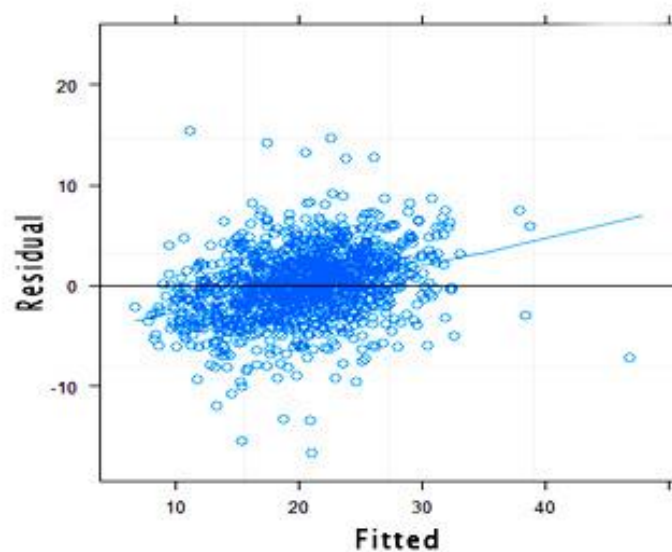

**Plot 1.** The residuals vs. fitted values plot in random intercept and slop model amongst male injection drug users aged 15-25 years

**1-2- Model selection:** Comparison of the linear mixed effect models (random intercept, random slope, and random intercept and slope) in male injection drug users aged 26-35 years

| Model                     | N parameters | AIC    | BIC    | Log likelihood | P *   |
|---------------------------|--------------|--------|--------|----------------|-------|
| Random intercept          | 4            | 8380.7 | 8401.4 | -4186.3        |       |
| Random slop               | 6            | 8378.0 | 8409.1 | -4183.0        | 0.282 |
| Random intercept and slop | 5            | 8377.2 | 8403.1 | -4183.6        | 0.019 |

\* P for the likelihood ratio test

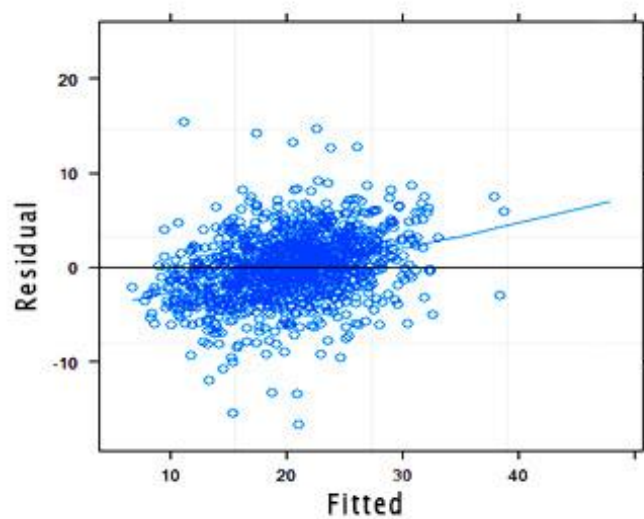

**Plot 2.** The residuals vs. fitted values plot in random intercept and slop model amongst male injection drug users aged 26-35 years

**1-3- Model selection:** Comparison of the linear mixed effect models (random intercept, random slope, and random intercept and slope) in male injection drug users aged >36 years

| Model                             | N parameters | AIC    | BIC    | Log likelihood | P *    |
|-----------------------------------|--------------|--------|--------|----------------|--------|
| Random intercept                  | 4            | 5750.7 | 5769.8 | -2871.3        |        |
| Random slop                       | 6            | 5736.0 | 5764.7 | -2862.0        | 0.049  |
| Random intercept and slop         | 5            | 5737.9 | 5761.8 | -2863.9        | <0.001 |
| * P for the likelihood ratio test |              |        |        |                |        |

Comparison of two models by confidence intervals for the parameters in male injection drug users aged >36 years

| Model                     | Intercept, 95% (CI) | Difference | Slop 95% (CI) | Difference |
|---------------------------|---------------------|------------|---------------|------------|
| Random slop               | 18.72, 20.85        | 2.3        | -1.09, -0.24  | 0.85       |
| Random intercept and slop | 18.76, 20.75        | 1.99       | -1.05, -0.26  | 0.79       |

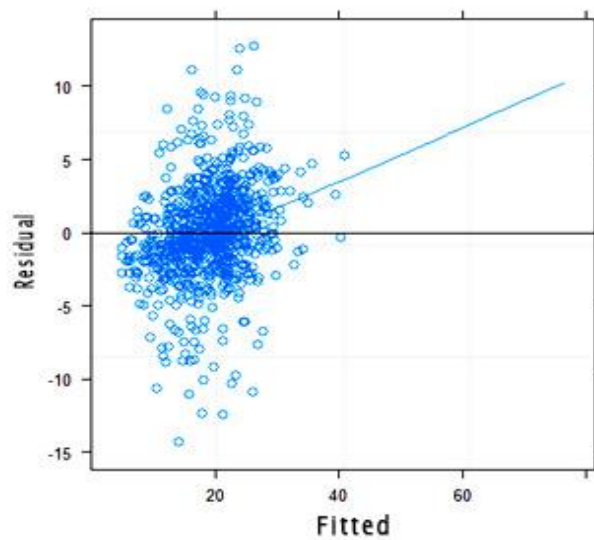

**Plot 3.** The residuals vs. fitted values plot in random intercept and slop model amongst male injection drug users aged >36 years

**1-4- Model selection:** Comparison of the linear mixed effect models (random intercept, random slope, and random intercept and slope) in female injection drug users

| Model                             | N parameters | AIC    | BIC    | Log-likelihood | P *   |
|-----------------------------------|--------------|--------|--------|----------------|-------|
| Random intercept                  | 4            | 645.69 | 656.19 | -318.84        |       |
| Random slop                       | 6            | 645.78 | 661.53 | -316.89        | 0.058 |
| Random intercept and slop         | 5            | 647.35 | 660.48 | -318.68        | 0.564 |
| * P for the likelihood ratio test |              |        |        |                |       |

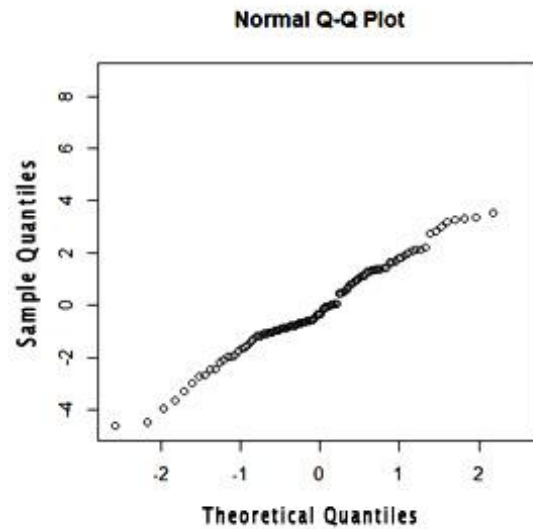

**Plot 4.** QQ plot for residuals for random slop model amongst female injection drug users

## 2- Model selection for the estimation of CD4 depletion model parameters in heterosexual contact

**2-1- Model selection:** Comparison of the linear mixed effect model (random intercept, random slope, and random intercept and slope) in heterosexual males aged <32 years

| Model                             | N parameters | AIC    | BIC    | Log-likelihood | P *   |
|-----------------------------------|--------------|--------|--------|----------------|-------|
| Random intercept                  | 4            | 6556   | 6575.7 | -3274          |       |
| Random slop                       | 6            | 6553.2 | 6582.7 | -3270.6        | 0.098 |
| Random intercept and slop         | 5            | 6554   | 6578.5 | -3272.         | 0.043 |
| * P for the likelihood ratio test |              |        |        |                |       |

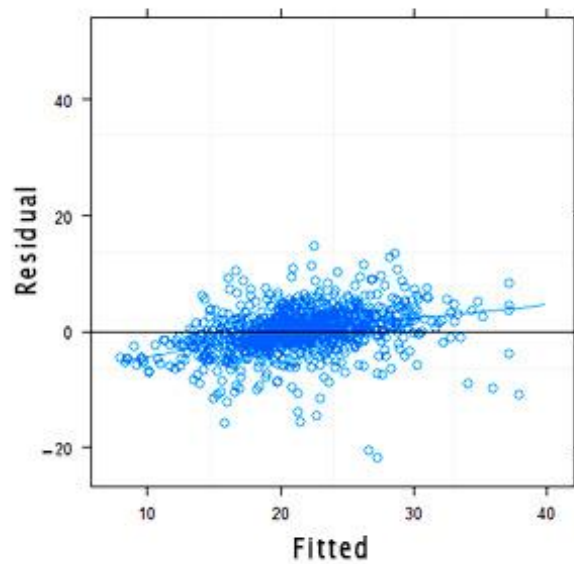

**Plot 5.** The residuals vs. fitted values plot in random intercept and slop model amongst heterosexual males aged <32 years

**2-2- Model selection:** Comparison of the linear mixed effect models (random intercept, random slope, and random intercept and slope) in heterosexual males >32 years

| Model                             | N parameters | AIC    | BIC    | Log- likelihood | P *    |
|-----------------------------------|--------------|--------|--------|-----------------|--------|
| Random intercept                  | 4            | 4933.8 | 4952.4 | -2462.9         |        |
| Random slop                       | 6            | 4924.1 | 4952   | -2456.1         | 0.10   |
| Random intercept and slop         | 5            | 4924.7 | 4947.9 | -2457.3         | <0.001 |
| * P for the likelihood ratio test |              |        |        |                 |        |

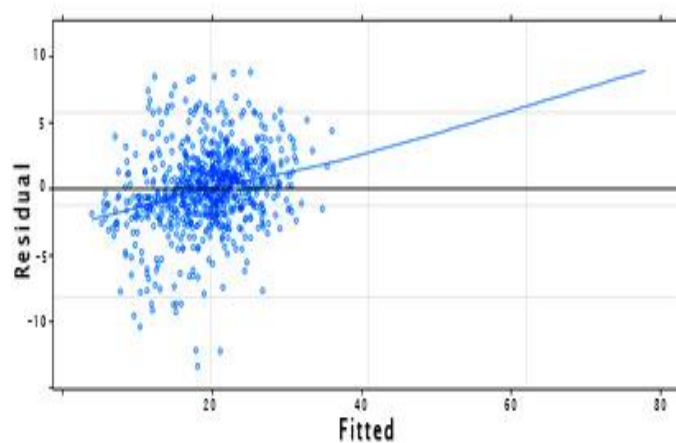

**Plot 6.** The residuals vs. fitted values plot in random intercept and slop model amongst heterosexual males >32 years

**2-3- Model selection:** Comparison of the linear mixed effect models (random intercept, random slope, and random intercept and slop) in heterosexual females aged  $\leq 32$  years

| Model                             | N parameters | AIC    | BIC    | Log-likelihood | P *   |
|-----------------------------------|--------------|--------|--------|----------------|-------|
| Random intercept                  | 4            | 1473.1 | 1486.9 | -732.57        |       |
| Random slop                       | 6            | 1470.4 | 1491.1 | -729.20        | 0.016 |
| Random intercept and slop         | 5            | 1474.1 | 1491.3 | -732.07        | 0.316 |
| * P for the likelihood ratio test |              |        |        |                |       |

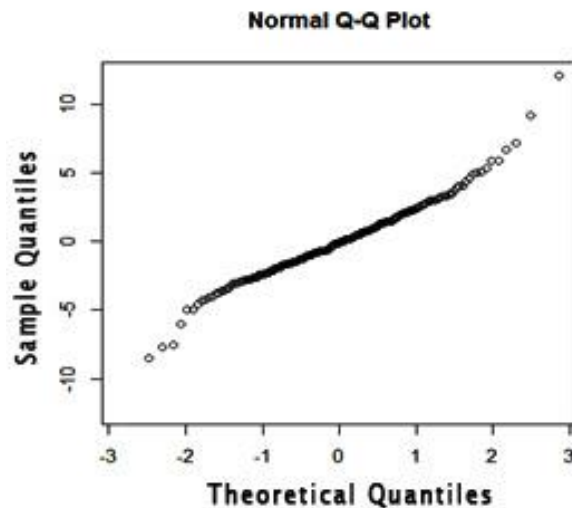

**Plot 7.** QQ plot for residuals for random slop model amongst heterosexual females aged  $\leq 32$  years

**2-4- Model selection:** Comparison of the linear mixed effect models (random intercept, random slope, and random intercept and slop) in heterosexual females aged  $>32$  years

| Model                             | N parameters | AIC | BIC    | Log-likelihood | P *  |
|-----------------------------------|--------------|-----|--------|----------------|------|
| Random intercept                  | 4            | 933 | 945.05 | -462.50        |      |
| Random slop                       | 6            | 936 | 954.80 | -462.37        | 0.60 |
| Random intercept and slop         | 5            | 935 | 950.06 | -462.50        | 1    |
| * P for the likelihood ratio test |              |     |        |                |      |

Comparison of two models by confidence intervals for the parameters in heterosexual females aged  $>32$  years

| Model                     | Intercept, 95% (CI) | Difference | Slop 95% (CI) | Difference |
|---------------------------|---------------------|------------|---------------|------------|
| Random slop               | 19.22, 23.30        | 4.08       | -1.05, -0.040 | 1.09       |
| Random intercept and slop | 19.15, 23.21        | 4.06       | -1.30, 0.034  | 1.33       |

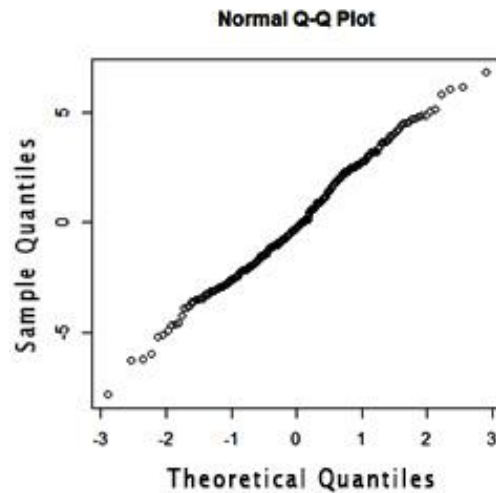

**Plot 8.** QQ plot for residuals for random slop model amongst heterosexual females aged >32 years

### 3- Model selection for the estimation of CD4 depletion model parameters in male-to-male sexual contact (MSM)

**3-1- Model selection:** Comparison of the linear mixed effect models (random intercept, random slope, and random intercept and slope) in MSM

| Model                             | N parameters | AIC    | BIC    | Log-likelihood | P *  |
|-----------------------------------|--------------|--------|--------|----------------|------|
| Random intercept                  | 4            | 1616.3 | 1630.7 | -804.16        |      |
| Random slop                       | 6            | 1620.2 | 1641.8 | -804.10        | 0.73 |
| Random intercept and slop         | 5            | 1618.3 | 1636.3 | -804.16        | 1    |
| * P for the likelihood ratio test |              |        |        |                |      |

Comparison of two models by confidence intervals for the parameters in MSM

| Model                     | Intercept, 95% (CI) | Difference | Slop 95% (CI) | Difference |
|---------------------------|---------------------|------------|---------------|------------|
| Random slop               | 21.29, 24.26        | 2.97       | -1.01, -0.16  | 0.85       |
| Random intercept and slop | 21.44, 24.41        | 2.97       | -1.18, -0.25  | 0.9        |

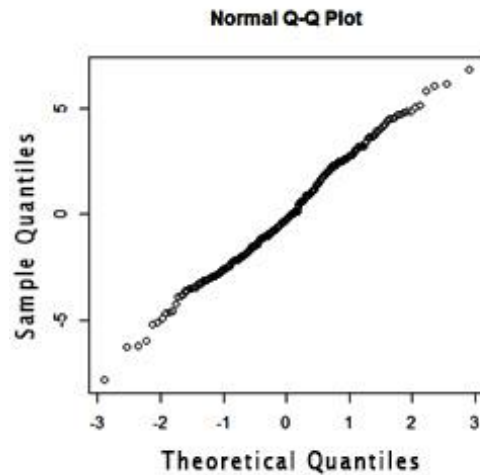

**Plot 9.** QQ plot for residuals for random slop model amongst MSM

#### 4- Model selection for the estimation of CD4 depletion model parameters in other transmission category

**4-1- Model selection:** Comparison of the linear mixed effect models (random intercept, random slope, and random intercept and slop) in patients with other modes of transmission

| Model                             | N parameters | AIC    | BIC    | Log-likelihood | P *   |
|-----------------------------------|--------------|--------|--------|----------------|-------|
| Random intercept                  | 4            | 6410.6 | 6430.1 | -3201.3        |       |
| Random slop                       | 6            | 6409.4 | 6438.8 | -3198.7        | 0.159 |
| Random intercept and slop         | 5            | 6409.4 | 6433.9 | -3199.7        | 0.076 |
| * P for the likelihood ratio test |              |        |        |                |       |

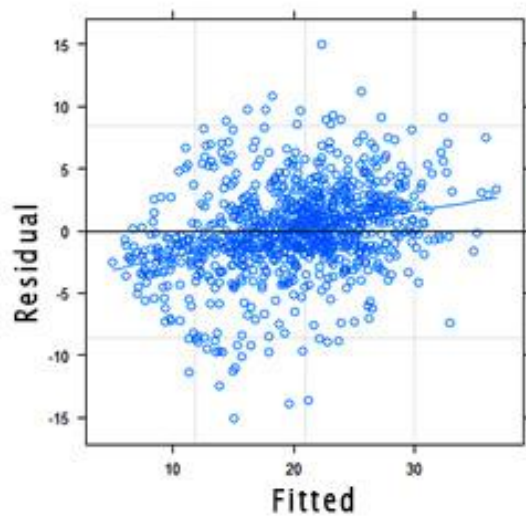

**Plot 10.** The residuals vs. fitted values plot in random intercept and slop model amongst patients with other modes of transmission
